# Supplementary material
Source: PubMed Central journal article supplement (PMC4885756)
Supplement: NIHMS773039-supplement-1.pdf [file NIHMS773039-supplement-1.pdf]

# Supplement to “Mechanical heterogeneities in the subendothelial matrix develop with age and decrease with exercise”

## The additive model

To assess the age and exercise effects on arterial stiffness, we estimated the following additive model: for mouse  $i$  and spatial location  $\mathbf{s} = (s_x, s_y)$  of the elastic modulus map,

$$Y_i(\mathbf{s}) = \mathbf{x}'_i \boldsymbol{\beta} + f_i(\mathbf{s}) + \epsilon_i(\mathbf{s}) \quad (1)$$

where  $Y_i(\mathbf{s})$  is the square-root-transformed elastic modulus,  $\mathbf{x}_i$  is the vector of predictors,  $\boldsymbol{\beta}$  is the corresponding vector of unknown regression coefficients to be estimated,  $f_i(\mathbf{s})$  is the unknown spatial variability term to be estimated, and  $\epsilon_i(\mathbf{s})$  is the independent and identically distributed measurement error, which is assumed to be normally distributed. The square-root transformation of the elastic modulus is necessary to satisfy the normality assumption for the measurement errors,  $\epsilon_i(\mathbf{s})$ . The vector of predictors,  $\mathbf{x}_i$ , contains indicators for the age and exercise groups of each mouse, and does not depend on the spatial location. The regression coefficients,  $\boldsymbol{\beta}$ , may be interpreted as in a standard linear regression model, and inference may be conducted on the group effects. The spatial locations,  $\mathbf{s}$ , are not directly comparable across mice: while the AFM measurements were recorded on an  $11 \times 11$  point grid within a  $100\mu\text{m} \times 100\mu\text{m}$  area of each artery, the precise locations within each artery cannot be made identical across mice. As a result, the spatial terms,  $f_i(\mathbf{s})$ , must be mouse-specific, and an ideal estimator of  $f_i(\mathbf{s})$  should be invariant to rotations of the spatial coordinate system for  $\mathbf{s}$ . The *thin plate spline* satisfies this and other optimality and smoothness properties, and is easy to implement within the `mgcv` package in R.

For each spatial effects term,  $f_i(\mathbf{s})$ , the thin plate spline produces an accompanying *smoothing parameter*. Consider a simplified setting in which we wish to model a response,  $y_i$ , as a smooth function of a (one-dimensional) predictor,  $x_i$ :  $y_i = f(x_i) + \epsilon_i$ , where  $\epsilon_i$  is a

random error term. The thin plate spline is the estimator of  $f$  which minimizes the penalized least squares criterion

$$\sum_i (y_i - f(x_i))^2 + \lambda J_1(f) \quad (2)$$

where  $J_1(f) = \int [f''(x)]^2 dx$  penalizes functions with large (in magnitude) second derivatives, i.e., rougher functions. The smoothing parameter,  $\lambda > 0$ , controls the trade-off between the first term, which measures goodness-of-fit, and the second term, which measures roughness. As  $\lambda \rightarrow 0$ , the first term dominates, and  $f$  approaches a rough interpolation of the data,  $y_i$ ; as  $\lambda \rightarrow \infty$ , the second term dominates, and  $f$  approaches a linear function. More details can be found in (Wood, 2006).

Under model (1), the penalized least squares criterion (2) generalizes to

$$\sum_{i, \mathbf{s}} (Y_i(\mathbf{s}) - \mathbf{x}'_i \boldsymbol{\beta} - f_i(\mathbf{s}))^2 + \sum_i \lambda_i J_2(f_i) \quad (3)$$

where

$$J_2(f) = \int \int \left( \frac{\partial^2 f(s_x, s_y)}{\partial s_x^2} \right)^2 + \left( \frac{\partial^2 f(s_x, s_y)}{\partial s_x \partial s_y} \right)^2 + \left( \frac{\partial^2 f(s_x, s_y)}{\partial s_y^2} \right)^2 ds_x ds_y,$$

which extends  $J_1$  using partial derivatives to measure roughness in both spatial directions  $s_x$  and  $s_y$ . The criterion (3) is minimized jointly over  $\boldsymbol{\beta}$  and  $f_i$  for all mice  $i$ . The smoothing parameters,  $\lambda_i$ , corresponding to each mouse-specific spatial term,  $f_i$ , are estimated from the data using generalized cross validation for computational efficiency, but other procedures produced similar results.

## The bootstrap

To compare the spatial heterogeneity of the age and exercise groups, we computed the within-group sample means of the log-smoothing parameters,  $\log \lambda_i$ . The (natural) logarithm transformation stabilizes the variance of  $\lambda_i$ , and produces more reasonable comparisons.

Since the sampling distribution of  $\log \lambda_i$  is unknown, we approximate it using the bootstrap (Efron and Tibshirani, 1994). The bootstrap uses a re-sampling procedure to estimate the sampling distribution based on the empirical distribution function of the data, and is broadly applicable.

Let  $N = 22$  be the number of mice. The bootstrap algorithm is the following:

For  $b = 1, \dots, B = 1,000$  bootstrap simulations,

1. Sample  $N = 22$  mice *with replacement* from the data to form the bootstrap data,  $\{Y_i^{(b)}(\mathbf{s})\}$ ;
2. Estimate model (1) by solving (3) with the bootstrap data,  $\{Y_i^{(b)}(\mathbf{s})\}$ ;
3. Compute the within-group sample means of the bootstrap log-smoothing parameters,  $\{\log \lambda_i^{(b)}\}$ .

The approximate sampling distributions of the within-group means of the log-smoothing parameters may then be compared using the bootstrap simulations. Note that we re-sample at the mouse level to preserve the within-mouse spatial structures, which is essential for measuring spatial heterogeneity.
